# Supplementary material for: Characteristic activity of phosphorous acid in the dehydration condensation of a chitin-derived nitrogen-containing sugar alcohol
Source: Royal Society of Chemistry journal article supplement (doi:10.1039/d1gc02193a), 2021-01-01
Supplement: d1gc02193a1.pdf [file d1gc02193a1.pdf]

## Electronic Supplementary Information

### Characteristic activity of phosphorous acid in the dehydration condensation of a chitin-derived nitrogen-containing sugar alcohol

Cheng Yang,<sup>1,2</sup> Takuya Sagawa<sup>1,3</sup>, Atsushi Fukuoka<sup>\*1</sup>, Hirokazu Kobayashi<sup>\*1</sup>

<sup>1</sup>Institute for Catalysis, Hokkaido University, Kita 21 Nishi 10, Kita-ku, Sapporo, Hokkaido 001-0021, Japan.

<sup>2</sup>Graduate School of Chemical Sciences and Engineering, Hokkaido University, Kita 13 Nishi 8, Kita-ku, Sapporo, Hokkaido 060-8628, Japan.

<sup>3</sup>Department of Industrial Chemistry, Faculty of Engineering, Tokyo University of Science, 12-1 Ichigayafunagawara-machi, Shinjuku-ku, Tokyo 162-0826, Japan.

E-mail: kobayashi.hi@cat.hokudai.ac.jp (H.K.); fukuoka@cat.hokudai.ac.jp (A.F.)

#### Table of contents

|                                                                                                                         |    |
|-------------------------------------------------------------------------------------------------------------------------|----|
| Table S1 Optimisation of reaction conditions for the dehydration of ADS by H <sub>3</sub> PO <sub>3</sub> .....         | S2 |
| Table S2 Dehydration of ADS by various catalysts under the optimised condition for H <sub>3</sub> PO <sub>3</sub> ..... | S2 |
| Fig. S1 A possible formation route of a furan derivative, and structure of a humin compound .....                       | S2 |
| Fig. S2 GPC charts of ADS dehydration product using various acid catalysts .....                                        | S3 |
| Table S3 GPC analysis of the product in the dehydration of ADS .....                                                    | S3 |
| Fig. S3 Time course of ADS dehydration by H <sub>3</sub> PO <sub>4</sub> .....                                          | S4 |
| Fig. S4 LC chart and mass spectra of the product solution after the dehydration of ADS .....                            | S4 |
| Fig. S5 <sup>31</sup> P NMR spectra of HPLC fractions for LC-MS analysis .....                                          | S5 |
| Fig. S6 Determination of the coefficients <i>a</i> and <i>b</i> using the least-squares method .....                    | S6 |
| Fig. S7 Proposed reaction mechanisms for (A) typical acid catalysts and (B) H <sub>3</sub> PO <sub>3</sub> .....        | S7 |

**Table S1** Optimisation of reaction conditions for the dehydration of ADS by H<sub>3</sub>PO<sub>3</sub>.<sup>a</sup>

| Entry | S/C | Temp.<br>/°C | Conv.<br>/% | Yield of product /% |           |           |           |       |        |
|-------|-----|--------------|-------------|---------------------|-----------|-----------|-----------|-------|--------|
|       |     |              |             | ADI                 | 1,4-AHADS | 3,6-AHADS | 1,5-AHADS | ADIAc | Others |
| S1    | 2.0 | 150          | 100         | 24                  | 1.8       | 1.3       | 7.0       | 3.5   | 63     |
| S2    | 2.0 | 130          | 100         | 24                  | 2.3       | 1.5       | 8.0       | 3.4   | 61     |
| S3    | 2.0 | 110          | 100         | 18                  | 5.4       | 5.5       | 23        | 3.0   | 46     |
| S4    | 4.0 | 130          | 100         | 25                  | 3.1       | 1.6       | 14        | 3.1   | 53     |
| S5    | 8.0 | 130          | 100         | 10                  | 16        | 4.8       | 30        | 2.0   | 38     |

<sup>a</sup>3 h, pressure <0.1 kPa, no solvent.**Table S2** Dehydration of ADS by various catalysts under the optimised condition for H<sub>3</sub>PO<sub>3</sub>.<sup>a</sup>

| Entry | Catalyst                          | Conv.<br>/% | Yield of product /% |           |           |           |       |        |
|-------|-----------------------------------|-------------|---------------------|-----------|-----------|-----------|-------|--------|
|       |                                   |             | ADI                 | 1,4-AHADS | 3,6-AHADS | 1,5-AHADS | ADIAc | Others |
| S6    | None                              | 42          | <0.1                | 10        | 2.3       | 7.1       | <0.1  | 23     |
| S7    | CF <sub>3</sub> SO <sub>3</sub> H | 100         | 28                  | <0.1      | <0.1      | 2.0       | 2.9   | 67     |
| S8    | Oxalic acid                       | 100         | 13                  | 11        | 21        | 33        | 7.8   | 14     |
| S4    | H <sub>3</sub> PO <sub>3</sub>    | 100         | 25                  | 3.1       | 1.6       | 14        | 3.1   | 53     |
| S9    | 2,4-DNBA                          | 100         | 12                  | 17        | 6.8       | 19        | 2.7   | 43     |
| S10   | H <sub>3</sub> PO <sub>4</sub>    | 100         | 8.9                 | 20        | 5.0       | 21        | 3.9   | 41     |

<sup>a</sup>S/C = 4.0, 130 °C, 3 h, pressure <0.1 kPa, no solvent. 2,4-DNBA: 2,4-dinitrobenzoic acid.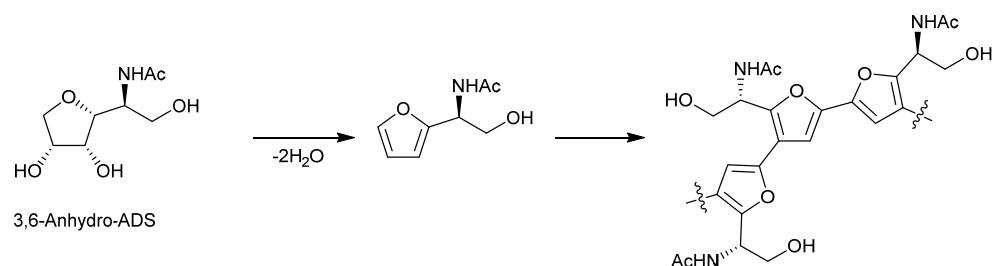**Fig. S1** A possible formation route of a furan derivative, and structure of a humin compound. Speculated based on the literature (ChemSusChem, 2013, 6, 1745).

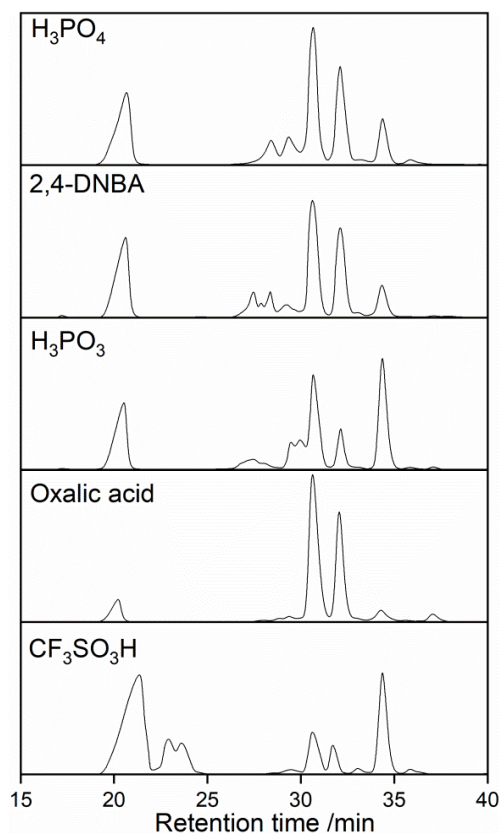

**Fig. S2** GPC charts of ADS dehydration product using various acid catalysts. 2,4-DNBA: 2,4-dinitrobenzoic acid.

**Table S3** GPC analysis of the product in the dehydration of ADS

| Catalyst                                     | Ratio of peak area /% |                |
|----------------------------------------------|-----------------------|----------------|
|                                              | $M_w > 300$           | $300 \geq M_w$ |
| None                                         | 0                     | 100            |
| CF <sub>3</sub> SO <sub>3</sub> H            | 62                    | 38             |
| H <sub>2</sub> C <sub>2</sub> O <sub>4</sub> | 10                    | 90             |
| H <sub>3</sub> PO <sub>3</sub>               | 37                    | 63             |
| 2,4-DNBA                                     | 60                    | 40             |
| H <sub>3</sub> PO <sub>4</sub>               | 53                    | 47             |

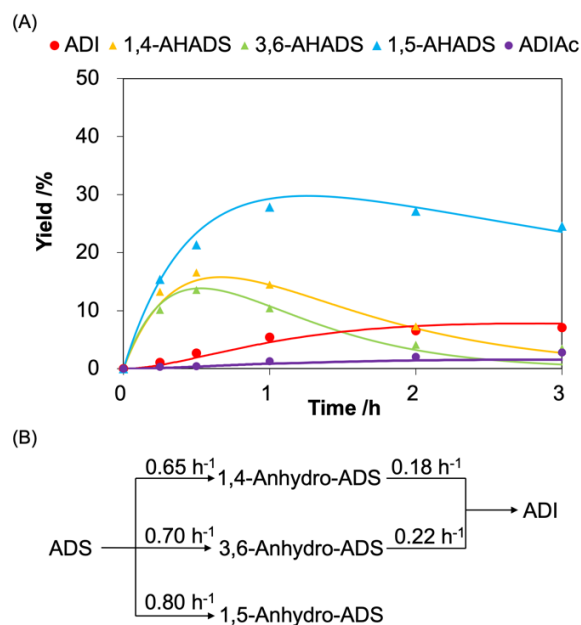

**Fig. S3** Time course of ADS dehydration by  $\text{H}_3\text{PO}_4$ . The plots indicate actual experimental results, and the lines show theoretical yield curves based on the kinetic analysis.

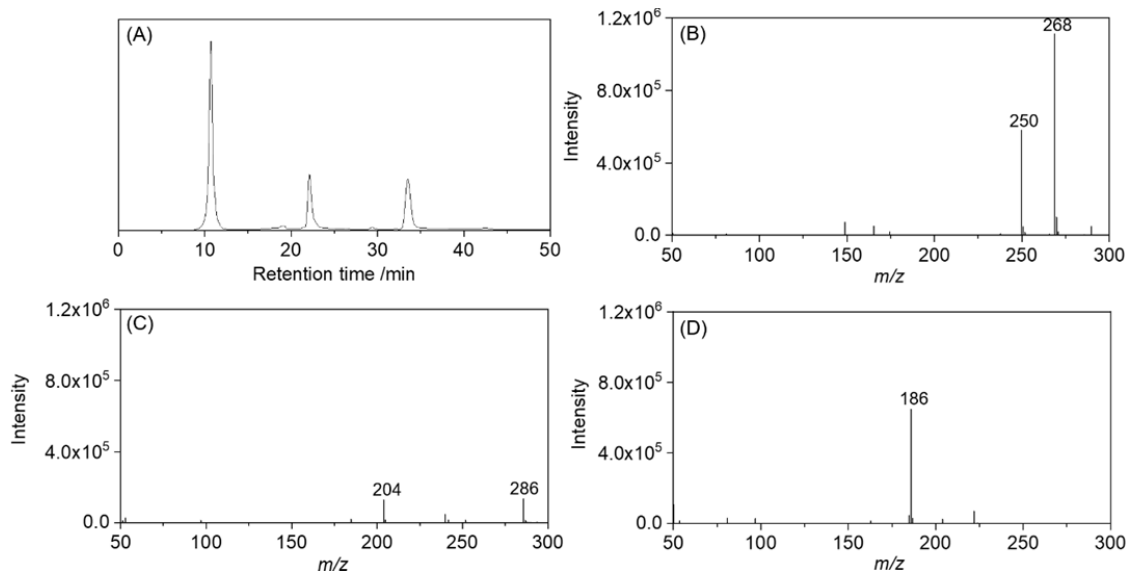

**Fig. S4** (A) LC chart of the product solution after the dehydration of ADS by  $\text{H}_3\text{PO}_3$  ( $\text{S/C} = 4.0$ ) at  $130^\circ\text{C}$  under  $< 0.1$  kPa of pressure for 1 h. The mass spectra with a negative ion mode at (B) 10 min, (C) 22 min and (D) 34 min.

#### Assignment of peaks observed in the mass spectra in Fig. S4

In (B), the peaks of  $m/z = 250$  and  $m/z = 268$  are ascribed to phosphorous acid esters of anhydro-ADS ( $[M-H_2O-H]^-$ ,  $m/z = 250$ ;  $[M-H]^-$ ,  $m/z = 268$ ). In (C), the peaks of  $m/z = 204$  and  $m/z = 286$  are ascribed to anhydro-ADS ( $[M-H]^-$ ,  $m/z = 204$ ) and phosphorous acid esters of ADS ( $[M-H]^-$ ,  $m/z = 286$ ). In (D),  $m/z = 186$  is ascribed to ADI ( $[M-H]^-$ ,  $m/z = 186$ ).

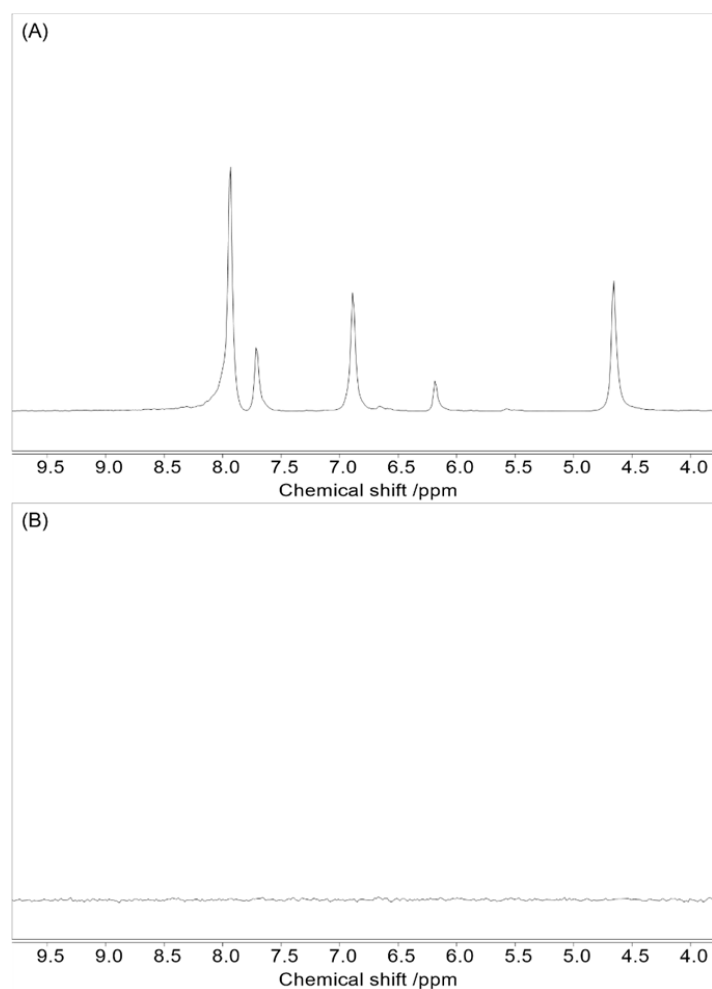

**Fig. S5**  $^{31}\text{P}$  NMR spectra of HPLC fractions for LC-MS analysis shown in Fig. S4. (A) Retention time: 10 min. (B) Retention time: 22 min.

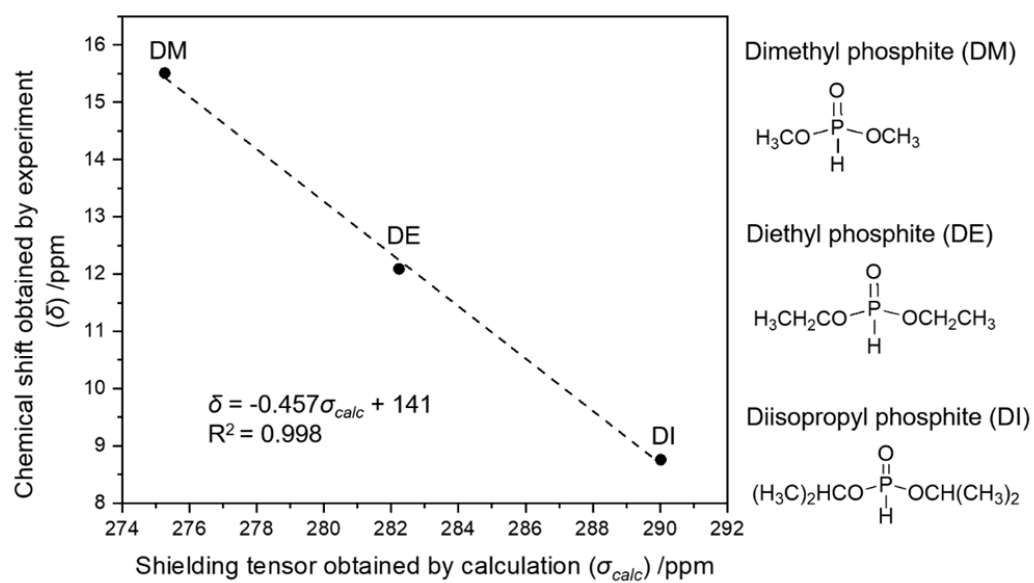

**Fig. S6** Determination of the coefficients  $a$  and  $b$  using the least-squares method using standard compounds

**(A) Simple acid-catalysed mechanism**

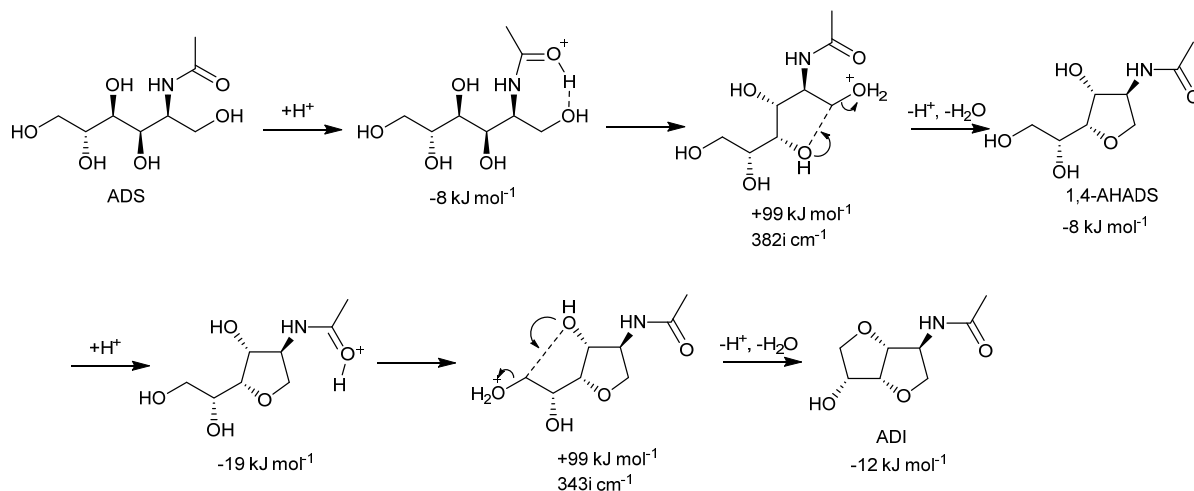

**(B) Phosphorus acid ester mechanism**

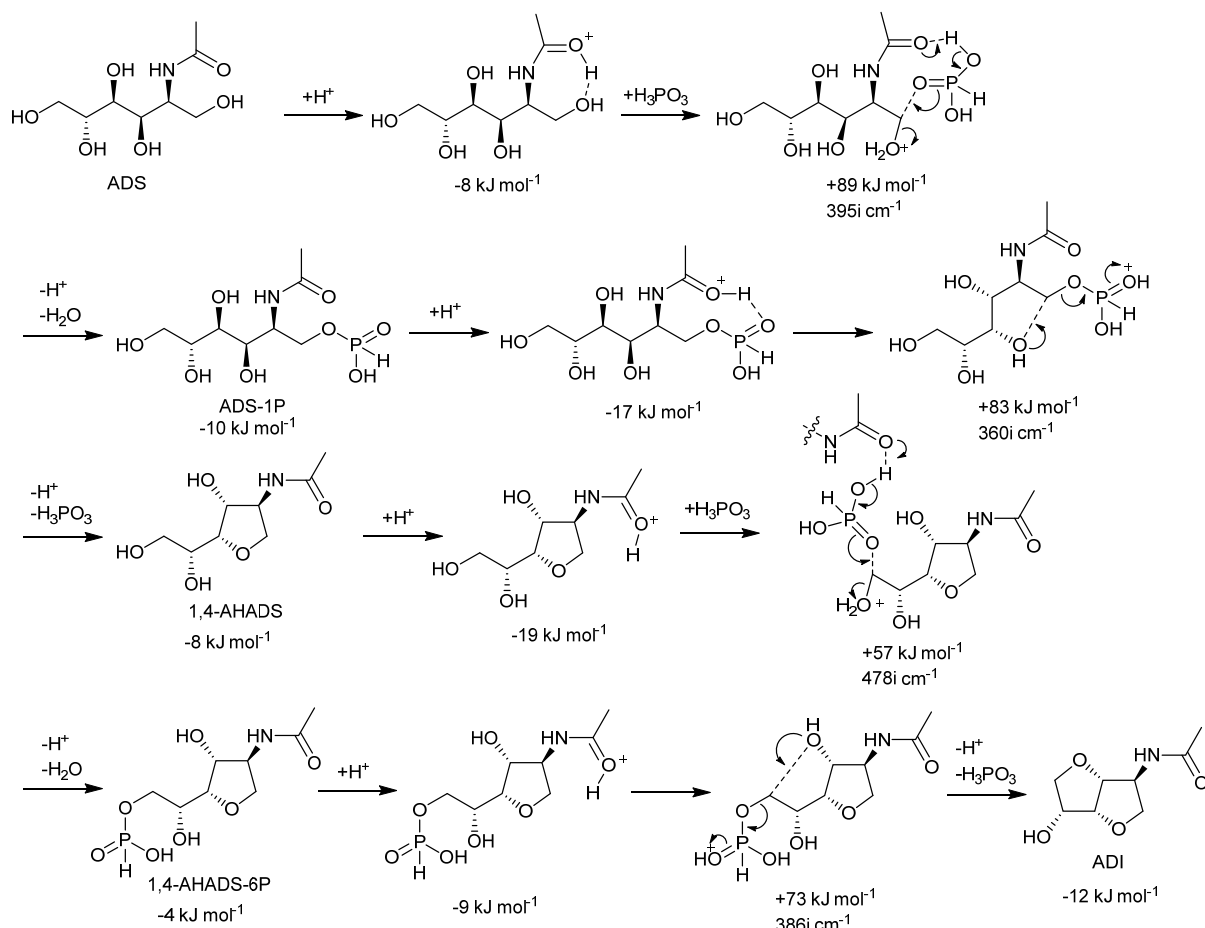

**Fig. S7** Proposed reaction mechanisms for (A) typical acid catalysts and (B)  $H_3PO_3$ . Proton formation assumes  $2H_3PO_3 \rightarrow H^+ + [H_2PO_3 \cdots H_3PO_3]^-$ .
